# Supplementary material for: Resveratrol-Loaded Polydimethylsiloxane–Silica Hybrid Materials: Synthesis, Characterization, and Antitumoral Activity
Source: MDPI journal article supplement (doi:10.3390/polym16070879), 2024-03-22
Supplement: s1 [file s1]

# Resveratrol-Loaded Polydimethylsiloxane–Silica Hybrid Materials: Synthesis, Characterization, and Antitumoral Activity

Sofia Viegas <sup>1</sup>, Diogo Marinheiro <sup>1</sup>, Verónica Bastos <sup>2</sup>, Ana L. Daniel-da-Silva <sup>1</sup>,  
Ricardo Vieira <sup>1</sup>, Helena Oliveira <sup>2</sup>, José Carlos Almeida <sup>3,\*</sup> and Bárbara J. M. L. Ferreira <sup>1,\*</sup>

<sup>1</sup> Department of Chemistry, CICECO-Aveiro Institute of Materials, University of Aveiro,  
3810-193 Aveiro, Portugal

<sup>2</sup> Department of Biology, CESAM-Centre for Environmental and Marine Studies, University of  
Aveiro, 3810-193 Aveiro, Portugal

<sup>3</sup> Department of Materials and Ceramic Engineering, CICECO-Aveiro Institute of Materials,  
University of Aveiro, 3810-193 Aveiro, Portugal

\* Corresponding author e-mail address: jcalmeida@ua.pt;      barbaraferreira@ua.pt

## Supplementary material

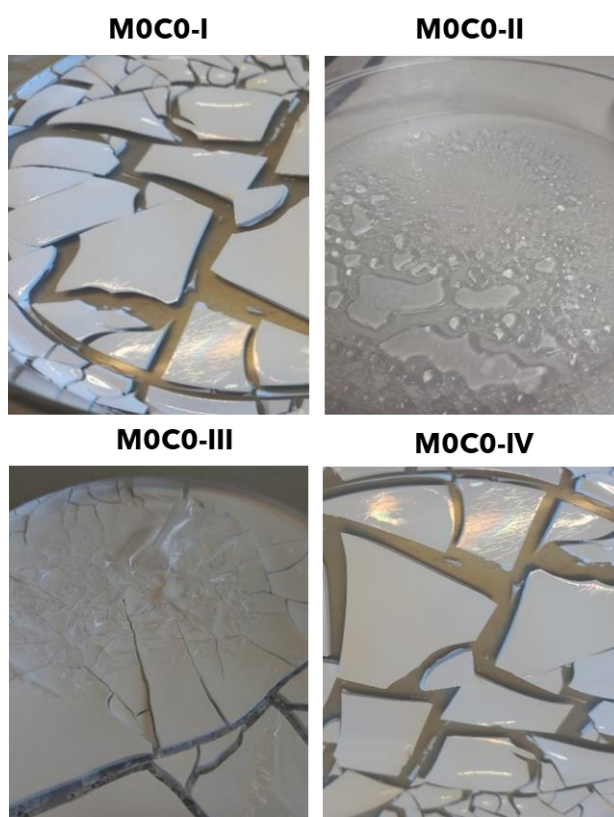

Figure S1: Photographs of the obtained materials after being dried and before being grounded to powder.

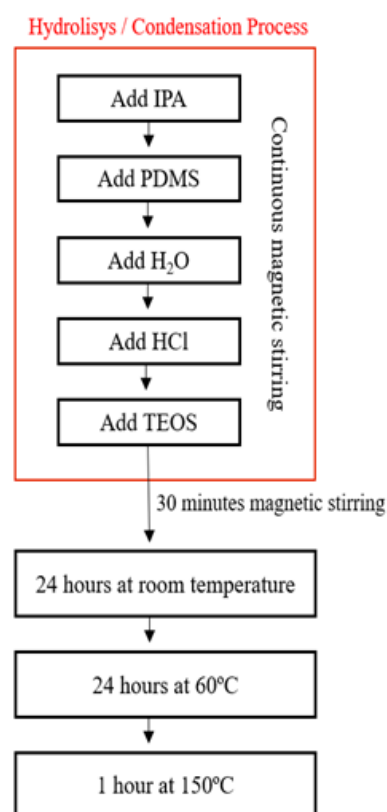

Figure S2: Flowchart of the synthesis procedure and post synthesis treatments.

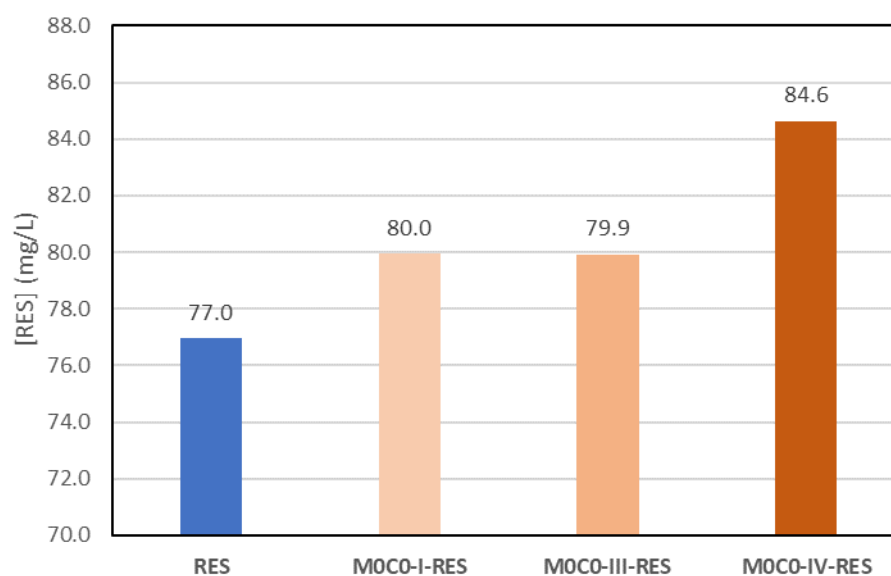

Figure S3: Solubility profiles of RES and RES loaded materials at pH 7.4 after 24 hours.
